# Supplementary material
Source: PubMed Central journal article supplement (PMC2856284)

## SUPPLEMENTAL DATA

### **Crystal Structure of the Peptidase Domain of *Streptococcus* ComA, a Bifunctional ATP-binding Cassette Transporter Involved in Quorum Sensing Pathway**

**Seiji Ishii, Takato Yano, Akio Ebihara, Akihiro Okamoto, Miho Manzoku, and Hideyuki Hayashi**

**FIGURE S1. Time Course of Rmsd of  $C_{\alpha}$  Atoms from the Corresponding Atoms of the Initial Structure during the MD Simulation.** The rmsd's of the MuPEP1–MuComC complex from the initial structure were calculated every 2 ps.

**FIGURE S2. Rms Positional Fluctuations of Each  $C_{\alpha}$  Atom of the MuPEP1–MuComC Complex.** *A*, Rms positional fluctuations of each  $C_{\alpha}$  atom of MuPEP1 (residues from 5 to 141) in the MD simulation during 0.4 ns–1.0 ns from the corresponding atom at 0.4 ns. Residue numbers corresponding to major peaks and troughs are shown. *B*, Rms positional fluctuations of each  $C_{\alpha}$  atom of MuComC (residues from –25 to –1) in the MD simulation during 0.4 ns–1.0 ns from the corresponding atom at 0.4 ns. The rmsd's of MuComC were calculated after rigid body alignment against the MuPEP1 component of the complex.

**FIGURE S3. Putative Hydrophobic Concaves of MuPEP1 (left) and PPEP (right).** Surface representation of the result from the HotPatch program. The hydrophilic region is colored in red and hydrophobic region is in blue. The regions enclosed by the orange oval lines indicate the hydrophobic concaves adjacent to the active site cleft. The two structures are aligned based on the least-squares superimposition of the  $C_{\alpha}$  atoms. The hydrophobic concave of MuPEP1 consists of Thr50, Ala51, Leu52, Val55, His87, Leu94, Gln95, Thr132, Leu134, and Ile136, and that of PPEP consists of Thr50, Ala51, Leu52, Val55, His87, Val88, Leu89, Leu94, Leu95, Thr132, Val134, and Leu136.

TABLE S1. X-ray Data Collection and Refinement Statistics

| Data set                                                                | Native                                                                  | Se-Remote      | Se-Peak                                                                 | Se-Edge        |
|-------------------------------------------------------------------------|-------------------------------------------------------------------------|----------------|-------------------------------------------------------------------------|----------------|
| Wavelength (Å)                                                          | 1.000                                                                   | 0.9000         | 0.9789                                                                  | 0.9795         |
| Space group                                                             | $P4_32_12$                                                              |                | $P4_32_12$                                                              |                |
| Unit cell parameters (Å)                                                | $a = b = 58.61,$<br>$c = 112.1$<br>$\alpha = \beta = \gamma = 90^\circ$ |                | $a = b = 59.03,$<br>$c = 112.5$<br>$\alpha = \beta = \gamma = 90^\circ$ |                |
| Molecules per asymmetric unit                                           | 1                                                                       | 1              | 1                                                                       | 1              |
| Resolution range (Å)                                                    | 50–1.9                                                                  | 50–1.9         | 50–1.9                                                                  | 50–1.9         |
| Reflections observed / unique                                           | 214,295/16,136                                                          | 218,026/16,371 | 217,224/16,358                                                          | 187,538/14,121 |
| Completeness (%)                                                        | 100.0 (100.0)                                                           | 100.0 (100.0)  | 100.0 (100.0)                                                           | 100.0 (100.0)  |
| Redundancy                                                              | 13.3                                                                    | 13.3           | 13.3                                                                    | 13.3           |
| Average $I/\sigma I$                                                    | 45.0 (10.2)                                                             | 40.7 (7.0)     | 43.5 (7.7)                                                              | 41.5 (8.8)     |
| $R_{\text{merge}}$ (%) <sup>a</sup>                                     | 6.4 (29.9)                                                              | 6.9 (33.7)     | 7.5 (30.2)                                                              | 6.7 (29.4)     |
| Refinement                                                              |                                                                         |                |                                                                         |                |
| Resolution range (Å)                                                    | 41–1.9                                                                  |                |                                                                         |                |
| Total reflections                                                       | 16,053                                                                  |                |                                                                         |                |
| $R_{\text{work}}$ (%) <sup>b</sup> / $R_{\text{free}}$ (%) <sup>c</sup> | 21.2/23.4                                                               |                |                                                                         |                |
| Number of protein atoms/water atoms                                     | 1,092/95                                                                |                |                                                                         |                |
| Rmsd <sup>d</sup> bond length (Å)                                       | 0.005                                                                   |                |                                                                         |                |
| Rmsd <sup>d</sup> angle (°)                                             | 1.20                                                                    |                |                                                                         |                |
| Average B-factor (Å <sup>2</sup> )                                      | 25.7                                                                    |                |                                                                         |                |
| Ramachandran plot                                                       |                                                                         |                |                                                                         |                |
| Most favored (%)                                                        | 91.7                                                                    |                |                                                                         |                |
| Additional (%)                                                          | 6.7                                                                     |                |                                                                         |                |
| Disallowed (%)                                                          | 1.7                                                                     |                |                                                                         |                |

Values in parentheses are for the highest resolution shell.

<sup>a</sup> $R_{\text{merge}} = \sum_h \sum_i |I_{h,i} - \langle I_h \rangle| / \sum_h \sum_i I_{h,i}$  where  $I_{h,i}$  is the  $i$ th observation of reflection  $h$  and  $\langle I_h \rangle$  is the mean intensity of reflection  $h$ .

<sup>b</sup> $R_{\text{work}} = \sum_h |F_{\text{obs}} - F_{\text{calc}}| / \sum_h |F_{\text{obs}}|$  where  $F_{\text{obs}}$  and  $F_{\text{calc}}$  are the observed and calculated structure factors, respectively.

<sup>c</sup> $R_{\text{free}}$  is calculated in the same manner as  $R_{\text{work}}$ , except that  $F_{\text{obs}}$  corresponds to 10% of the reflections not used in the refinement.

<sup>d</sup>Rmsd, root-mean-square deviation.

**TABLE S2. Oligonucleotides Used for the Site-directed Mutagenesis**

| Name       | Sequence                                       |
|------------|------------------------------------------------|
| T50Sf      | 5'-GACCATGGATGGGACGTCGGCTTTGGGCTTGGTC-3'       |
| T50Sr      | 5'-GACCAAGCCCAAAGCCGACGTCCCATCCATGGTC-3'       |
| A51Wf      | 5'-CCATGGATGGGACGACGTGGTTGGGCTTGGTCAAGG-3'     |
| A51Wr      | 5'-CCTTGACCAAGCCCAACCACGTCGTCCCATCCATGG-3'     |
| L52Af      | 5'-GATGGGACGACGGCTGCGGGCTTGGTCAAGGTG-3'        |
| L52Ar      | 5'-CACCTTGACCAAGCCCGCAGCCGTCGTCCCATC-3'        |
| V55Af      | 5'-CGGCTTTGGGCTTGGCCAAGGTGGCAGAGGA-3'          |
| V55Ar      | 5'-TCCTCTGCCACCTTGGCCAAGCCCAAAGCCG-3'          |
| L52A/V55Af | 5'-CGACGGCTGCGGGCTTGGCCAAGGTGGCAGAGGAG-3'      |
| L52A/V55Ar | 5'-CTCCTCTGCCACCTTGGCCAAGCCCGCAGCCGTCG-3'      |
| A67Wf      | 5'-GATTGGTTTTGAGACGCGATGGATTAAGGCAGATATGACG-3' |
| A67Wr      | 5'-CGTCATATCTGCCTTAATCCATCGCGTCTCAAACCAATC-3'  |
| L94Af      | 5'-CTTAAGGAAGGGAAAGCGTCCACTACTATGTG-3'         |
| L94Ar      | 5'-CACATAGTAGTGGAGCGCTTCCCTTCCTTAAG-3'         |
| V134Af     | 5'-GAAGAATGGACAGGAGCGACTCTTTTTATGGCAC-3'       |
| V134Ar     | 5'-GTGCCATAAAAAGAGTCGCTCCTGTCCATTCTTC-3'       |

FIGURE S1

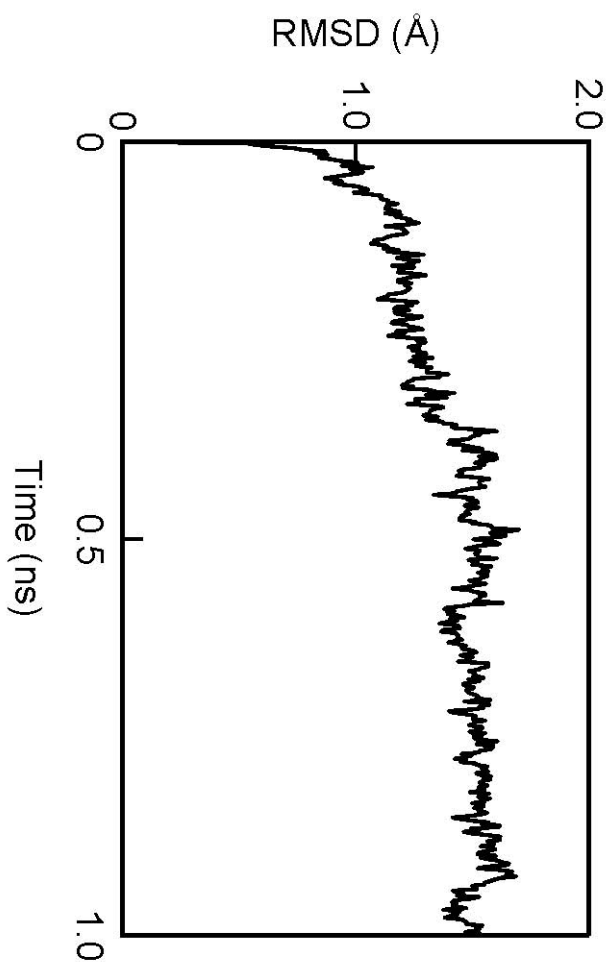

FIGURE S2

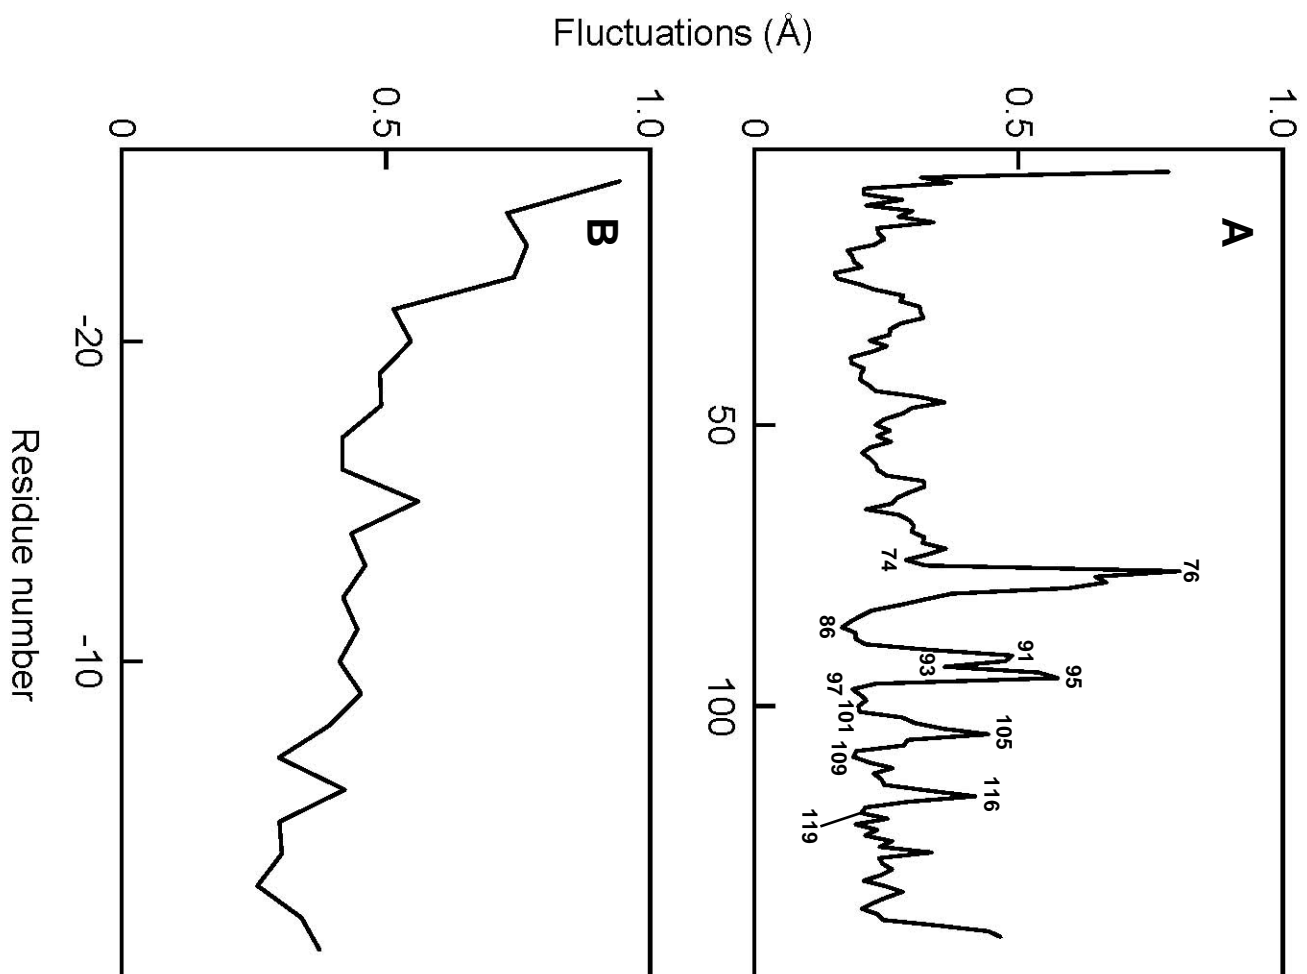

FIGURE S3

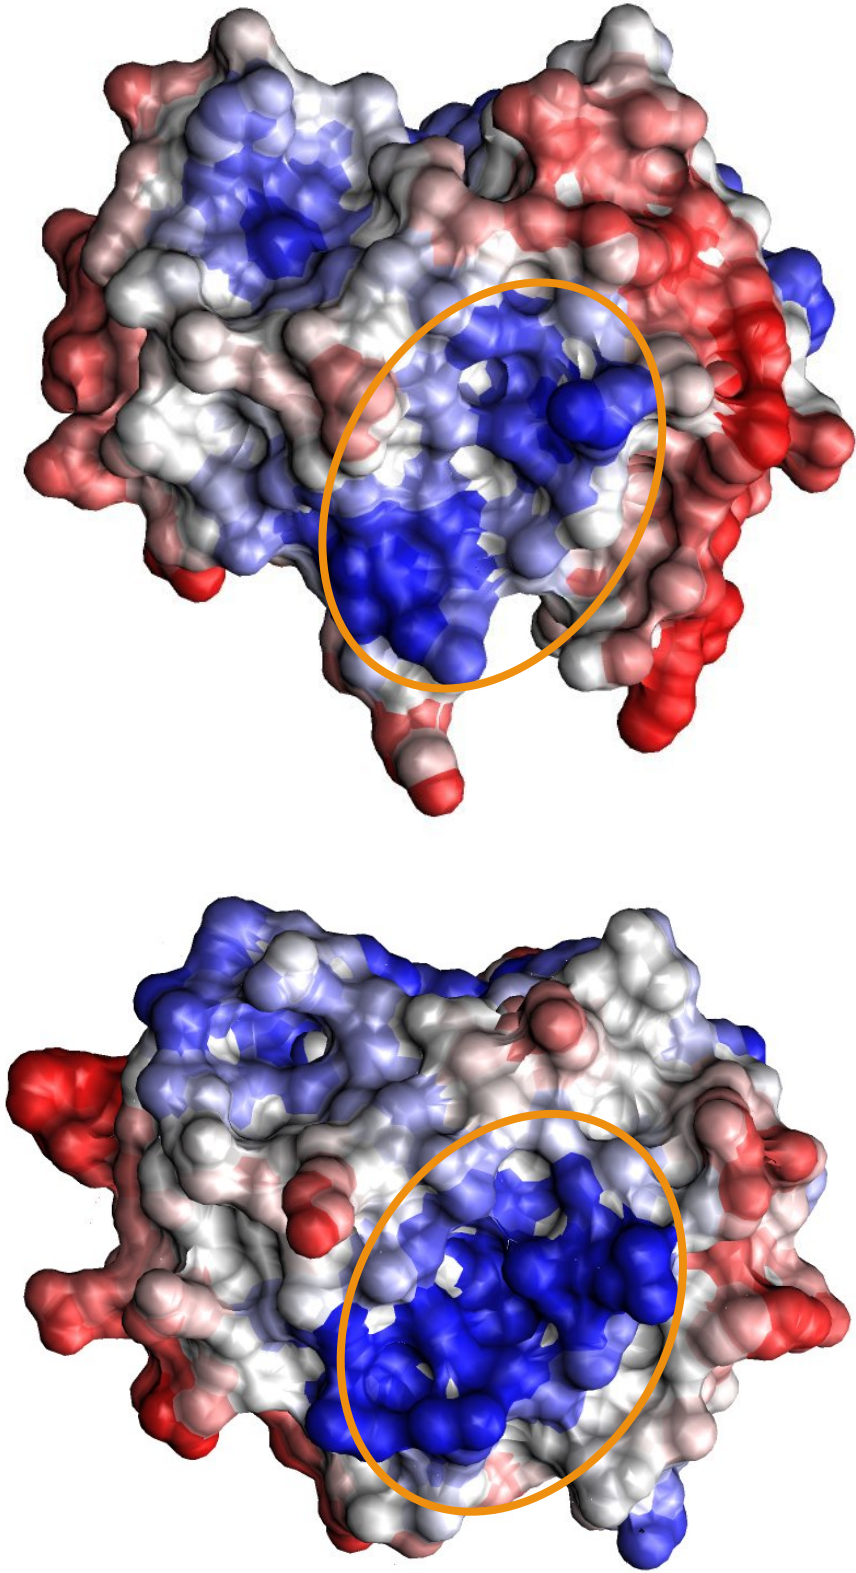

Supplement: supp_M109.093781_jbc.M109.093781-1.pdf [file supp_M109.093781_jbc.M109.093781-1.pdf]
